# Supplementary material for: Reducing Anxiety and Enhancing Performance: The Impact of AI Chatbots versus Human Facilitation on EFL Speaking Assessment Outcomes
Source: Research Square preprint supplement (doi:10.21203/rs.3.rs-7482174/v1), 2025-10-20
Supplement: Supplementary file 1 [file e984f5a471dc8c467ec08bfc.docx]

**Semi-Structured Interview Protocol**

**Study Title:** Reducing Anxiety and Enhancing Performance: The Impact of AI Chatbots versus Human Facilitation on EFL Speaking Assessment Outcomes

**Interview Questions:**

1. Considering your experiences to date, how do you evaluate your English speaking proficiency?
2. Have you previously participated in speaking examinations or practice sessions with either human evaluators or AI chatbots?
3. You have completed two different speaking assessments—one with an AI-supported chatbot and one with human evaluators.

a. In which assessment did you perceive yourself to perform better?

b. In which situation did you feel more comfortable or uncomfortable? Please explain your reasons.

1. How would you compare AI chatbots and human evaluators with each other?
2. In the future, which method would you prefer for speaking practice or examinations—AI or human interaction? Please provide your rationale.
3. When you become a teacher, would you utilize AI-supported technology in your speaking lessons or examinations? Please explain your reasoning.
4. Did the AI chatbot provide you with written feedback after the examination? How do you evaluate this feedback in terms of its usefulness and accuracy?
